# Supplementary material for: Glycogen Storage Disease: Expert Opinion on Clinical Diagnosis Revisited after Molecular Testing
Source: MDPI journal article supplement (doi:10.3390/genes14122219), 2023-12-15
Supplement: s1 [file s1]

**Supplementary Table S1.** Genotype data of the patients/cases that based the clinical discussion [8].

| Case |     | Gene           | Codon             | Protein          | Zygosity | Classif. <sup>1</sup> | GSD Type |
|------|-----|----------------|-------------------|------------------|----------|-----------------------|----------|
| #    | Sex |                |                   |                  |          |                       |          |
| 1    | F   | <i>PHKG2</i>   | c.927+1G>A        | p.?              | hom      | LP                    | IXc      |
| 2    | M   | <i>PHKA2</i>   | c.3629G>A         | p.Gly1210Glu     | hem      | LP                    | IXa      |
| 3    | M   | <i>G6PC</i>    | c.247C>T          | p.Arg83Cys       | het      | P                     | Ia       |
|      |     |                | c.231-1G>A        | p.?              | het      | P                     |          |
| 4    | M   | <i>G6PC</i>    | c.77delC          | p.Ser26=fs       | het      | P                     | Ia       |
|      |     |                | c.563-3C>G        | p.?              | het      | VUS                   |          |
| 5    | M   | <i>G6PC</i>    | c.247C>T          | p.Arg83Cys       | hom      | P                     | Ia       |
| 6    | F   | <i>PYGL</i>    | c.697G>A          | p.Gly233Ser      | hom      | P                     | VI       |
| 7    | F   | <i>G6PC</i>    | c.563-3C>G        | p.?              | hom      | VUS                   | Ia       |
| 8    | F   | <i>SLC37A4</i> | c.899G>A          | p.Arg300His      | het      | P                     | Ib       |
|      |     |                | c.1042_1043delCT  | p.Leu348Valfs*53 | het      | P                     |          |
| 9    | F   | <i>PHKB</i>    | c.1972-2A>G       | p.?              | het      | P                     | IXb      |
|      |     |                | c.2060C>G         | p.Ser687*        | het      | LP                    |          |
| 10   | F   | <i>AGL</i>     | c.1383G>A         | p.Trp461*        | het      | P                     | III      |
|      |     |                | c.3475_3476insA   | p.Gln1159fs      | het      | LP                    |          |
| 11   | M   | <i>SLC37A4</i> | c.703_705delGTG   | p.Val236del      | het      | P                     | Ib       |
|      |     |                | c.1042_1043delCT  | p.Leu348Valfs*53 | het      | P                     |          |
| 12   | M   | <i>G6PC</i>    | c.247C>T          | p.Arg83Cys       | hom      | P                     | Ia       |
| 13   | M   | <i>SLC37A4</i> | c.899G>A          | p.Arg300His      | hom      | P                     | Ib       |
| 14   | F   | <i>AGL</i>     | c.3214_3215delGA  | p.Glu1072Aspfs   | het      | P                     | III      |
|      |     |                | c.4528_4529insA   | p.Tyr1510Terfs   | het      | P                     |          |
| 15   | M   | <i>G6PC</i>    | c.247C>T          | p.Arg83Cys       | het      | P                     | Ia       |
|      |     |                | c.1039C>T         | p.Gln347*        | het      | P                     |          |
| 16   | F   | <i>PHKB</i>    | c.572_576delAGATT | p.Gln191Hisfs    | het      | LP                    | IXb      |
|      |     |                | c.1972-2A>G       | p.?              | het      | P                     |          |
| 17   | M   | <i>G6PC</i>    | c.247C>T          | p.Arg83Cys       | hom      | P                     | Ia       |
| 18   | M   | <i>PHKB</i>    | c.1972-2A>G       | p.?              | het      | P                     | IXb      |
|      |     |                | c.2060C>G         | p.Ser687*        | het      | LP                    |          |
| 19   | M   | <i>G6PC</i>    | c.563-3C>G        | p.?              | het      | VUS                   | Ia       |
|      |     |                | c.1039C>T         | p.Gln347*        | het      | P                     |          |
| 20   | M   | <i>SLC37A4</i> | c.1042_1043delCT  | p.Leu348Valfs*53 | hom      | P                     | Ib       |
| 21   | M   | <i>G6PC</i>    | c.247C>T          | p.Arg83Cys       | hom      | P                     | Ia       |
| 22   | F   | <i>G6PC</i>    | c.70C>T           | p.Gln24*         | het      | P                     | Ia       |
|      |     |                | c.161A>C          | p.Gln54Pro       | het      | P                     |          |
| 23   | M   | <i>G6PC</i>    | c.70C>T           | p.Gln24*         | het      | P                     | Ia       |
|      |     |                | c.161A>C          | p.Gln54Pro       | het      | P                     |          |
| 24   | F   | <i>G6PC</i>    | c.247C>T          | p.Arg83Cys       | het      | P                     | Ia       |
|      |     |                | c.401_402delCT    | p.Thr134=fs      | het      | P                     |          |
| 25   | F   | <i>G6PC</i>    | c.247C>T          | p.Arg83Cys       | het      | P                     | Ia       |
|      |     |                | c.401_402delCT    | p.Thr134=fs      | het      | P                     |          |
| 26   | F   | <i>SLC37A4</i> | c.1042_1043delCT  | p.Leu348Valfs*53 | hom      | P                     | Ib       |
| 27   | M   | <i>SLC37A4</i> | c.1042_1043delCT  | p.Leu348Valfs*53 | hom      | P                     | Ib       |
| 28   | M   | <i>G6PC</i>    | c.247C>T          | p.Arg83Cys       | het      | P                     | Ia       |
|      |     |                | c.161A>C          | p.Gln54Pro       | het      | P                     |          |

**Supplementary Table S1.** continuation.

| Case |     | Gene    | Codon            | Protein          | Zygosity | Classif. <sup>1</sup> | GSD type |
|------|-----|---------|------------------|------------------|----------|-----------------------|----------|
| #    | Sex |         |                  |                  |          |                       |          |
| 29   | M   | PHKB    | c.1972-2A>G      | p.?              | het      | P                     | IXb      |
|      |     |         | c.2181delT       | p.Leu728Phefs*4  | het      | LP                    |          |
| 30   | M   | PHKA2   | c.883C>T         | p.Arg295Cys      | hem      | P                     | IXa      |
| 31   | M   | PHKA2   | c.883C>T         | p.Arg295Cys      | hem      | P                     | IXa      |
| 32   | M   | PHKA2   | c.2452C>T        | p.Gln818*        | hem      | LP                    | IXa      |
| 33   | M   | G6PC    | c.247C>T         | p.Arg83Cys       | hom      | P                     | Ia       |
| 34   | M   | G6PC    | c.247C>T         | p.Arg83Cys       | het      | P                     | Ia       |
|      |     |         | c.1039C>T        | p.Gln347*        | het      | P                     |          |
| 35   | M   | AGL     | c.1571G>A        | p.Arg524His      | het      | P                     | III      |
|      |     |         | c.3625C>T        | p.Gln1209*       | het      | LP                    |          |
| 36   | M   | AGL     | c.744G>A         | p.Trp248*        | het      | LP                    | III      |
|      |     |         | c.3484C>T        | p.Gln1162*       | het      | P                     |          |
| 37   | M   | SLC37A4 | c.706_708delGTG  | p.Val236del      | het      | P                     | Ib       |
|      |     |         | c.1042_1043delCT | p.Leu348Valfs*53 | het      | P                     |          |
| 38   | F   | G6PC    | c.202G>A         | p.Gly68Arg       | het      | P                     | Ia       |
|      |     |         | c.439A>T         | p.Arg147*        | het      | LP                    |          |
| 39   | M   | PHKG2   | c.502C>T         | p.Arg168*        | hom      | P                     | IXc      |
| 40   | M   | AGL     | c.293+2T>A       | p.?              | het      | LP                    | III      |
|      |     |         | c.1858_1859delCT | p.Leu620Valfs*7  | het      | P                     |          |
| 41   | F   | PHKG2   | c.835C>T         | p.Arg279Cys      | het      | LP                    | IXc      |
|      |     |         | c.927+1G>A       | p.?              | het      | LP                    |          |
| 42   | M   | PHKA2   | c.3614C>T        | p.Pro1205Leu     | hem      | P                     | IXa      |
| 43   | F   | G6PC    | c.809G>T         | p.Gly270Val      | hom      | P                     | Ia       |
| 44   | M   | PHKA2   | c.883C>T         | p.Arg295Cys      | hem      | P                     | IXa      |
| 45   | M   | G6PC    | c.161A>C         | p.Gln54Pro       | hom      | P                     | Ia       |

Obs.: Patients 9 and 18, 22 and 23, and 24 and 25 are pairs of siblings.

Key: F = female; hem = hemizygous; het = heterozygous; hom = homozygous; LP = likely pathogenic; M = male; P = pathogenic; VUS = variant of unknown significance.

<sup>1</sup> The variant classification following ACMG criteria was updated on Dec. 12<sup>th</sup>, 2023; asserted at the Franklin by Genoox Database (<https://franklin.genoox.com/clinical-db/home>).

**Supplementary Table S2. Clinical Form (Template).**

|                                                                                             |                          |                                       |
|---------------------------------------------------------------------------------------------|--------------------------|---------------------------------------|
| Case #: XX                                                                                  | Filling Date: __/__/____ |                                       |
| Age:                                                                                        | Sex: ( ) F / ( ) M       | Parental consanguinity: ( ) Y / ( ) N |
| Age of onset of symptoms:                                                                   |                          |                                       |
| Uric acid:                                                                                  |                          |                                       |
| Liver biopsy:                                                                               |                          |                                       |
| Ketonuria:                                                                                  |                          |                                       |
| Cholesterol level:                                                                          |                          |                                       |
| CPK:                                                                                        |                          |                                       |
| Inflammatory bowel disease:                                                                 |                          |                                       |
| Hepatomegaly:                                                                               |                          |                                       |
| Hypoglycemia:                                                                               |                          |                                       |
| Lactate:                                                                                    |                          |                                       |
| Neutropenia:                                                                                |                          |                                       |
| Proteinuria:                                                                                |                          |                                       |
| Transaminases:                                                                              |                          |                                       |
| Triglycerides:                                                                              |                          |                                       |
|                                                                                             |                          |                                       |
| In your opinion, the clinical case described is compatible with which type of glycogenosis? |                          |                                       |
| ( ) Ia   ( ) Ib   ( ) III   ( ) VI   ( ) IXa   ( ) IXb   ( ) IXc                            |                          |                                       |
| Comments:                                                                                   |                          |                                       |
